# Supplementary material
Source: PubMed Central journal article supplement (PMC3927983)
Supplement: NIHMS517115-supplement-1.pdf [file NIHMS517115-supplement-1.pdf]

| <b>Supplemental Table I: Primers used for quantitative realtime PCR amplification</b> |                            |                            |
|---------------------------------------------------------------------------------------|----------------------------|----------------------------|
| <b>Gene</b>                                                                           | <b>Forward</b>             | <b>Reverse</b>             |
| <i>Ccl11</i>                                                                          | GAATCACCAACAACAGATGCAC     | ATCCTGGACCCACTTCTTCTT      |
| <i>Ccl24</i>                                                                          | TCTTAGGGCCCTTCTTGGTG       | AATCCAGAAAACCGAGTGG        |
| <i>Ccl26</i>                                                                          | AGCTGCACCAGTGACGGTGTGATATT | GATGAATCTCTGCACCCATTTGGCCC |
| <i>Col1a2</i>                                                                         | AGCAGGTCCTTGGAACCTT        | AAGGAGTTTCATCTGGCCCT       |
| <i>Col3a1</i>                                                                         | GTGAACGGGGCGAAGCTGGTT      | GCGGCTCCTGGAAGCCCATTG      |
| <i>Mmp2</i>                                                                           | TTTGCTCGGGCCTTAAAAGTAT     | CCATCAAACGGGTATCCATCTC     |
| <i>Mmp3</i>                                                                           | AGCCTTGGCTGAGTGGTAGA       | CGATGATGAACGATGGACAG       |
| <i>Mmp9</i>                                                                           | TGCCCATTTGACGACGAC         | GTGCAGGCCGAATAGGAGC        |
| <i>Mmp13</i>                                                                          | GGTCCTTGGAGTGATCCAGA       | TGATGAAACCTGGACAAGCA       |

**Supplemental Figure 1:** Histopathologic features of severe EAM in IFN $\gamma$ <sup>-/-</sup>IL17A<sup>-/-</sup> mice. From top to bottom: A) Pericarditis with extensive pericardial fibrosis and effusion, 200x. B) Cardiomyocyte necrosis 200x. C) Endocarditis, 40x. D) Atrial thrombosis, 10x. E) Ectopic germinal center-like follicular structures, 40x. H&E staining.

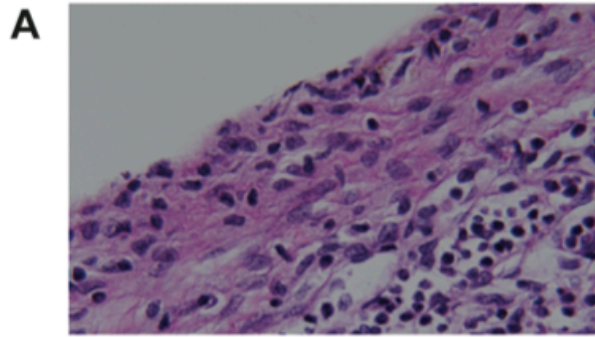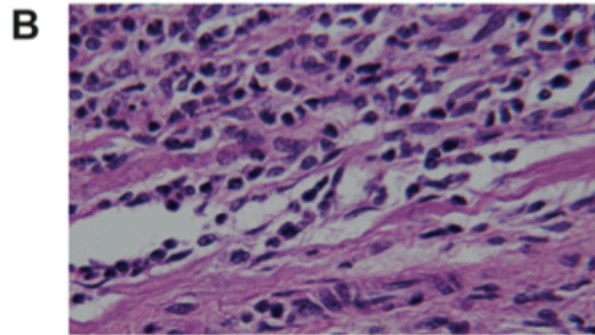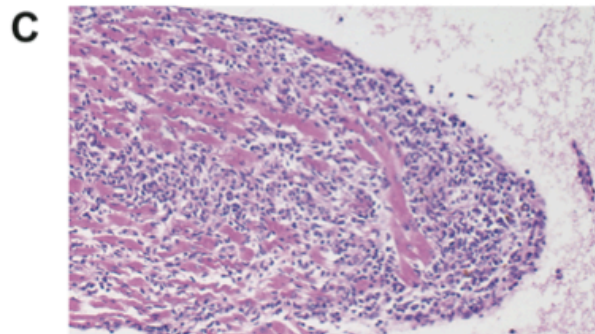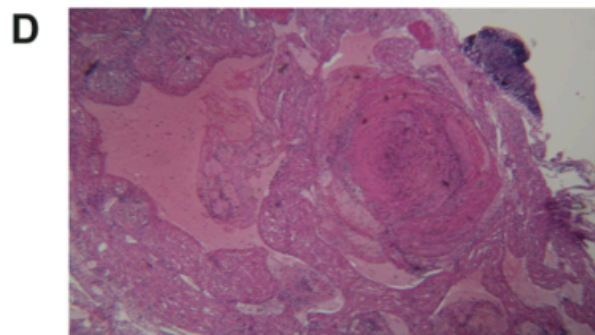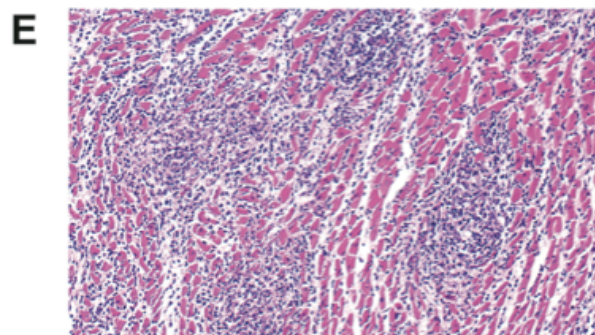

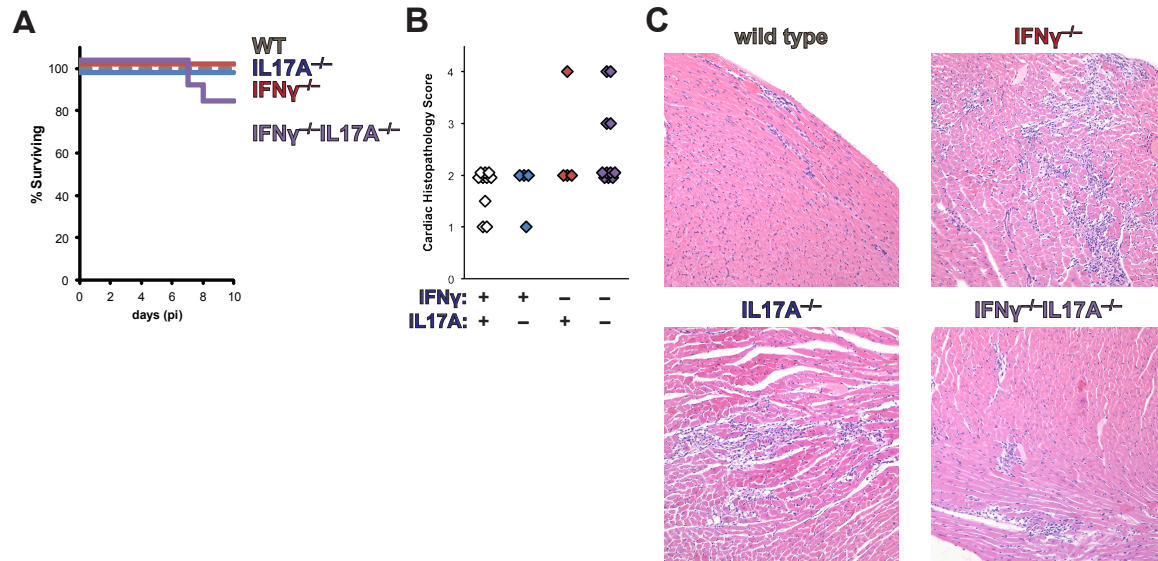

**Supplemental Figure 2:** Responses of  $IFN\gamma^{-/-}IL17A^{-/-}$  mice to infection with coxsackievirus B3 (CVB3). A) Survival of male  $IFN\gamma^{-/-}IL17A^{-/-}$  (violet,  $n = 13$ ),  $IFN\gamma^{-/-}$  (red,  $n = 4$ ),  $IL17A^{-/-}$  (blue,  $n = 5$ ), and wild type (dashed grey,  $n = 10$ ) mice during the first 10 days of CVB3 infection. B) Cardiac histopathology of mice surviving at day 10. C) Representative histopathology of median individual animals of each group, H&E stained, 40x. Individual data points represent individual animals. Statistics are by Kaplan-Meier log rank and Kruskal-Wallis ANOVA.

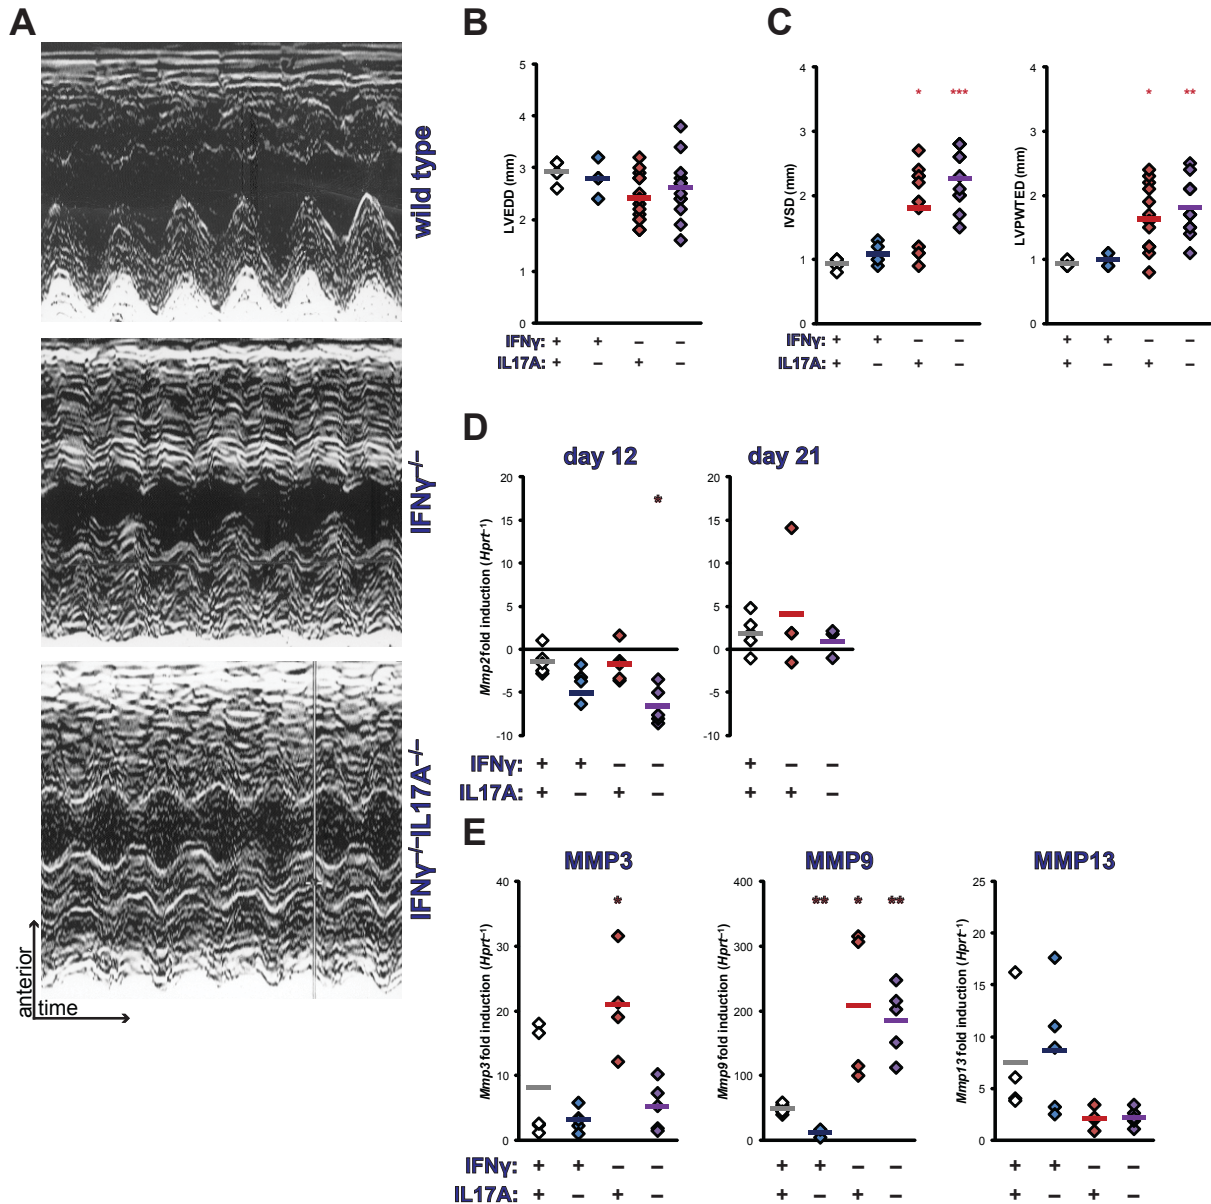

**Supplemental Figure 3:** Regulation of cardiac remodeling and dilation in  $IFN\gamma^{-/-}IL17A^{-/-}$  EAM. A) Representative M-mode echocardiographic imaging of animals at day 14 of EAM. Figure depicts median individual in each group. M-mode echocardiographic measurement of B) left ventricular diastolic dimension (LVEDD), C) left ventricular wall thicknesses – intraventricular septum (IVSD, left), and the posterior wall (LVPWTEd, right) at day 14 of EAM. Transcriptional regulation of D) MMP2 on days 12 (left) and 21 (right) in  $IFN\gamma^{-/-}IL17A^{-/-}$  (violet),  $IFN\gamma^{-/-}$  (red),  $IL17A^{-/-}$  (blue), and wild type (open) mice with EAM. E) Transcriptional regulation of MMP3, MMP9, and MMP13 on day 12 of EAM. Individual data points represent individual animals. Statistics are by two-tailed Students' *t*-test. Asterisks denote \*  $p < 0.05$ ; \*\*  $p < 0.005$ .
